# Supplementary material
Source: Research Square preprint supplement (doi:10.21203/rs.3.rs-10085897/v1)
Supplement: Supplementary file 2 [file f06ac3cb344bec373f73d2f6.xlsx]

## Sheet: Sheet1
	Group	Genome ID	Source	Status	CheckV completeness (%)	Taxonomy (vConTACT3)	Genome length (bp)	GC contents (%)	No. of protein-coding genes	No. of tRNAs
	A	A1	Rimov Reservoir (Crech)	Complete	95.2151	Arenbergviridae	336383	37.9	432	6		SRR6754100_NODE_13_length_256164_cov_17.735898_curated_complete
		A2	Rimov Reservoir (Crech)	Complete	95.7757	Arenbergviridae	338302	37.8	423	5		ERR12084906_NODE_734_length_64952_cov_33.569826_curated_complete
		A3	Lake Malstasjön (Sweden)	Complete	94.528	Arenbergviridae	333972	37.7	433	6		ERR4194708_NODE_11_length_61092_cov_4.191077_complete_final
	B	B1	Rimov Reservoir (Crech)	Complete	93.4316	Kyanoviridae	155826	36.1	227	3		ERR12084938_NODE_61751_length_3810_cov_17.801792_curated_complete
		B2	Rimov Reservoir (Crech)	Complete	97.7123	Kyanoviridae	161454	36.4	235	3		SRR6754098_NODE_331_length_103749_cov_9.080273_curated_complete
		B3	Lake Mendota (USA)	Complete	98.6246	Kyanoviridae	163870	36.1	229	4		SRR27420223_NODE_298_length_52324_cov_6.569975_curated_complete
	C	C1	Lake Michigan (USA)	Partial	80.771	Arenbergviridae	281716	39.2	340	1		Lake_Michigan_coassembly_NODE_6572_length_16288_cov_12.374296_curated_final
		C2	Lake Superior (USA)	Complete	81.7672	Arenbergviridae	285182	39.2	345	1		SRR35646680_NODE_761_length_16355_cov_3.693616_curated_complete
		C3	Flathead Lake (USA)	Partial	77.369	Arenbergviridae	269864	39.2	338	1		SRR24100035_NODE_215_length_20361_cov_2.496046_curated_final
		C4	Lake Zurich (Switzerland)	Complete	78.2515	Arenbergviridae	272940	39.2	330	1		SRR6475631_NODE_398_length_30246_cov_14.375577_curated_complete
		C5	Lake Lugano (Switzerland/Italy)	Complete	81.3333	Arenbergviridae	283672	39.3	340	1		ERR5863105_NODE_6352_length_15639_cov_3.904977_curated_complete
